# Supplementary material
Source: publisher figshare collection journal article supplement (https://sage.figshare.com/ndownloader/files/13650875)
Supplement: Supplementary file 1 [file 13650875]

## Supplemental Table 1 – Survey

---

Question 1: Age of Surgeon

- a) < 40
- b) 41-50
- c) 51-65
- d) 65 and older

---

Question 2: Gender

- a) Female
- b) Male

---

Question 3: Years in practice

- a) 1-5
- b) 6-10
- c) 11-15
- d) 16-20
- e) 21-25
- f) 26-30
- g) >30

---

Question 4: Type of practice setting

- a) Academic
- b) Community

---

Question 5: Percentage of practice devoted to treatment of venous disease (%)

- a) 1-25
- b) 26-50
- c) 51-75
- d) 76-100

---

Question 6: Motivations for treating chronic venous disease in your practice\*

- a) Interesting cases
- b) Relief of patient symptoms
- c) Scope of practice of vascular surgeons
- d) Revenue Stream
- e) Time control
- f) Lifestyle decision

---

Question 7: What types of venous pathology do you treat?\*

- a) Spider veins
- b) Varicose veins
- c) Varicose veins with edema
- d) Varicose veins with signs of venous insufficiency

---

Question 8: What treatments do you offer for chronic venous disease?\*

- a) Compression

- b) Sclerotherapy
  - c) Open surgery (ligation, stripping, stab phlebectomies)
  - d) Endovenous catheter procedures (EVLT, RFA, glue)
  - e) Others (please specify)
- 

Question 9: Regarding assessment of patients prior to surgery/procedure for varicose veins:

- a) Rely on clinical exam and Doppler only without duplex ultrasound
  - b) Use duplex ultrasound exam in own office only
  - c) Routinely send patients for ultrasound at an ultrasound facility
  - d) Selectively send patients for ultrasound at an ultrasound facility
  - e) Others (please specify)
- 

Question 10: What is the main barrier in carrying out venous ultrasound imaging?

- a) Unnecessary with good clinical exam
  - b) No duplex ultrasound available in office
  - c) Wait time too long for formal ultrasound lab
  - d) No access to formal ultrasound lab for superficial venous disease
  - e) No barrier
  - f) Other (please specify)
- 

Question 11: Do you believe that there are gaps between published guidelines on the care of venous disease and actual practice in your area?

- a) Strongly disagree
  - b) Disagree
  - c) Neutral
  - d) Agree
  - e) Strongly agree
- 

Question 12: Do you believe your residency/fellowship training prepared you adequately for an active venous practice

- a) Yes
  - b) No
- 

Question 13: How did you prepare for your current practice in chronic venous disease therapy?\*

- a) Trial and error
  - b) Read books or journals
  - c) Attend venous training courses
  - d) Obtain help and advice from colleagues
  - e) Formal fellowship
  - f) Others (please specify)
- 

Question 14: Would you attend a hands-on course in venous therapy offered by the CSVS?

- a) Yes
  - b) No
- 

Question 15: What challenges do you face with respect to venous therapy?\*

- a) Lack of knowledge/skills in contemporary procedures
- b) Lack of public awareness of venous disease
- c) Lack of time due to overwhelming arterial pathologies

- d) Equipment cost/office space limitations
  - e) Institutional/group practice restrictions
  - f) Competition with other specialties treating venous disease
  - g) Others (please specify)
- 

Question 16: Do you believe vascular surgeons should be leaders in delivering care for patients with chronic venous disease?

- a) Strongly disagree
  - b) Disagree
  - c) Neutral
  - d) Agree
  - e) Strongly agree
- 

Question 17: What other specialties in your area also offer treatment for varicose veins?\*

- a) Interventional radiologists
  - b) Dermatologists
  - c) Family physicians
  - d) General surgeons
  - e) Others (please specify)
- 

Question 18: Canadian vascular surgeons could substantially increase the number of vascular jobs and improve patient care if we all do more venous work

- a) Strongly disagree
  - b) Disagree
  - c) Neutral
  - d) Agree
  - e) Strongly agree
- 

Question 19: Additional comments?

---

\*More than one response is allowed
